# Supplementary material
Source: PubMed Central journal article supplement (PMC3404218)
Supplement: NIHMS382184-supplement-01.pdf [file NIHMS382184-supplement-01.pdf]

Supplementary information to “Conformational dynamics of CYP3A4 demonstrate the important role of Arg212 coupled with the opening of ingress, egress and solvent channels to dehydrogenation of 4-hydroxy-tamoxifen” by K. Shahrokh, T. E. Cheatham III and G. S. Yost submitted to Biochimica et Biophysica Acta. (2012).

**Figure 1:** 2D RMSD plots of five independent MD trajectories (m1-m5) of PDB ID:1TQN. The X and Y-axis represent ~40 ns of MD with the color ranging from low RMSD at blue (0 Å) through green (~1.5 Å) to higher RMSD going from yellow (~2 Å) to red (< 3 Å).

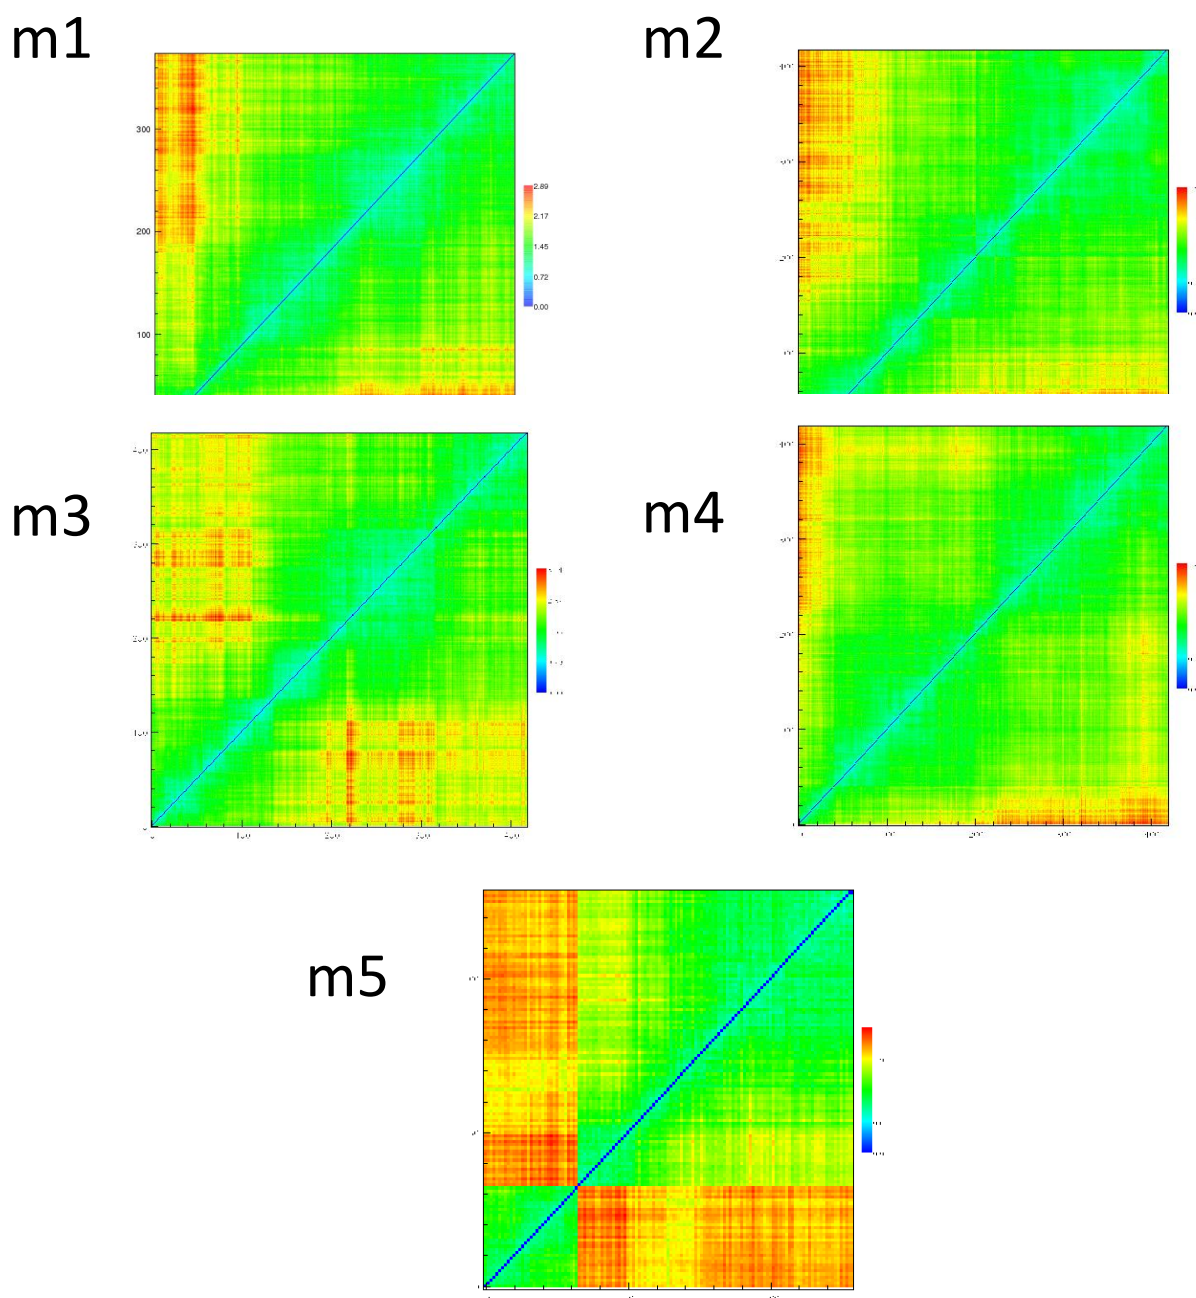

**Supplementary Figure 2:** Difference in HF versus B3LYP energies for dihedral scan of MTOXY tail (C5-C4-O11-C12)

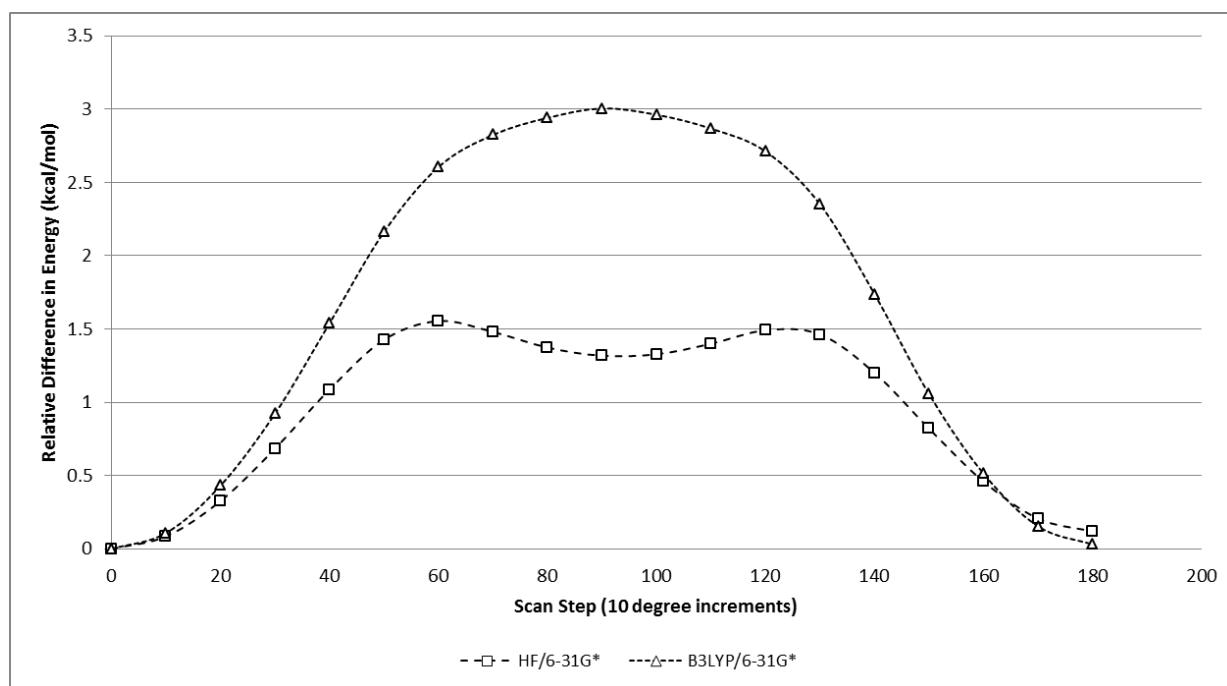

**Supplementary information Figure 3:** Structures and numbering scheme of training set for ethyl (C7-C8-C11-C12) dihedral scans in relation to each ring system.

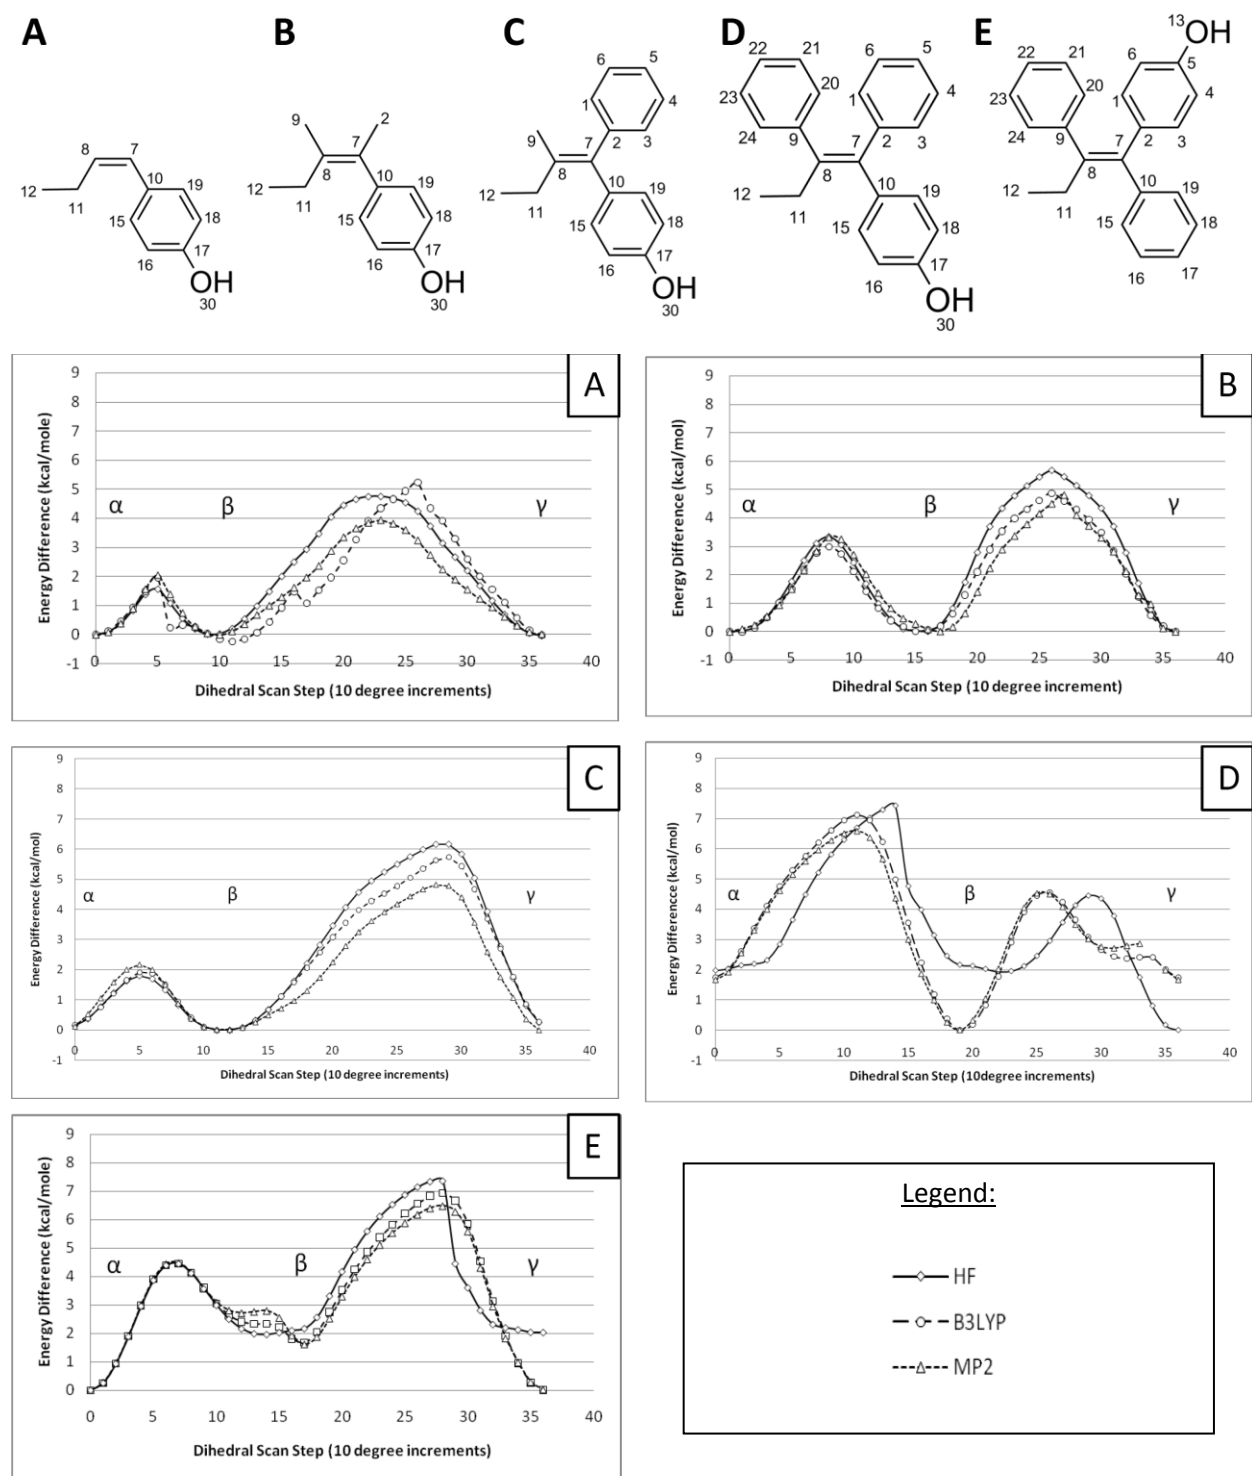

**Supplementary information Figure 4:** Ratio of Autodock3 binding modes supportive of observed metabolism of 4-hydroxy-tamoxifen reaction mechanisms alpha-hydroxylation ( $\alpha$ -OH), dehydrogenation modes 1 & 2 (dH1 & dH2), N-demethylation (NdM) and non-productive and/or ambiguous modes (Non) with CYP3A4 (A) molecular dynamics refined m1-m5, experimentally derived x-ray (B) PDB ID: 1W0E, (C) PDB ID: 1TQN refined with quantum mechanics based heme parameters for resting high-spin (ic6) and Compound-I (cpdi) with (wq) and without (00) RESP charges assigned to the heme. Statistically significant differences are indicated with symbols: †, ‡ and \* and differences are explained directly below each graph. Charge state of 4-hydroxy-tamoxifen is denoted as foht=neutral and fohtq=+1.

(A)

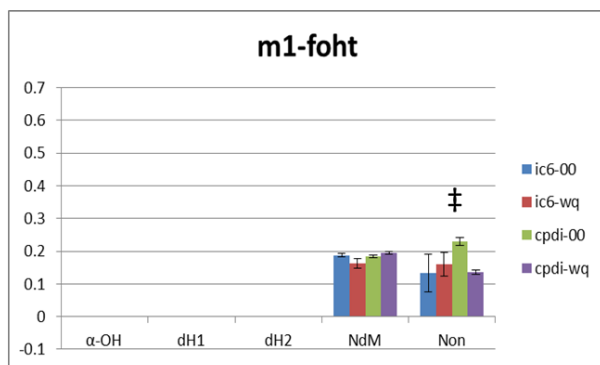

(‡) Non: cpdi-00 different from cpdi-wq

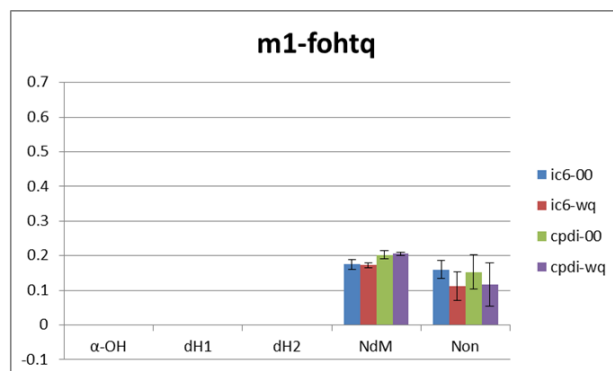

No significant differences between any of the results

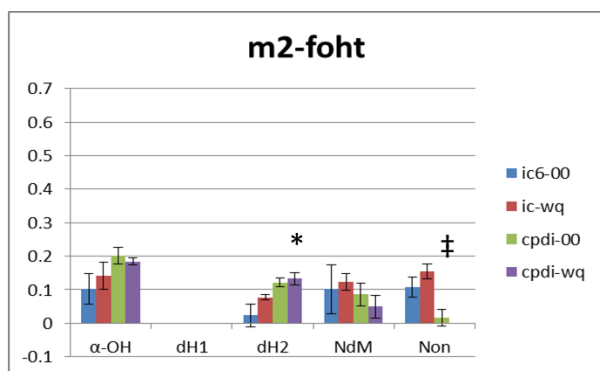

(\*) dH2: ic6-00 from both cpdi's

(‡) Non: both ic6's from both cpdi's

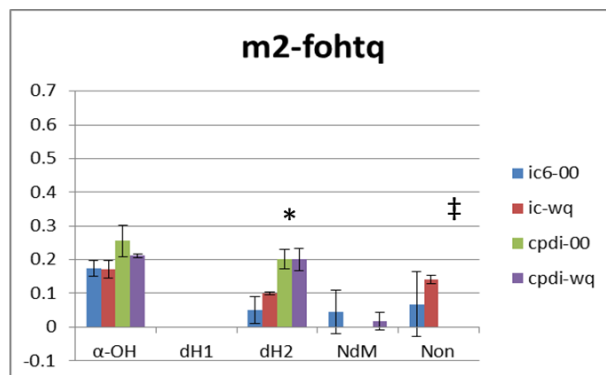

(\*) dH2: ic6-00 from both cpdi's

(‡) Non: both ic6's from both cpdi's

(A)

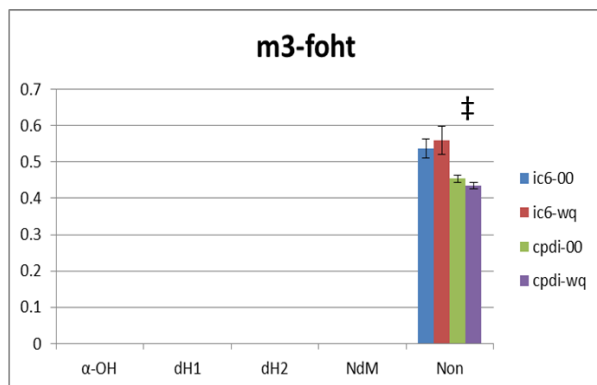

(‡) Non: both ic6's from both cpdi's

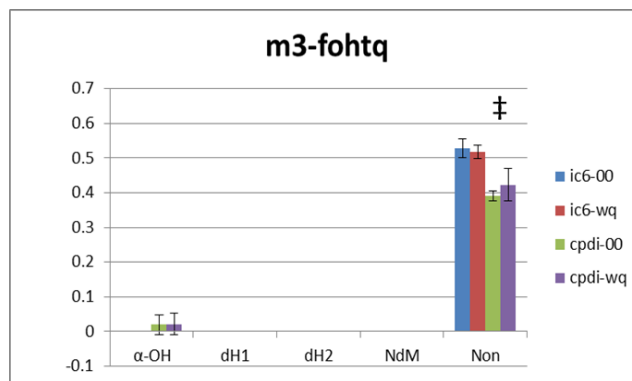

(‡) Non: both ic6's from both cpdi's

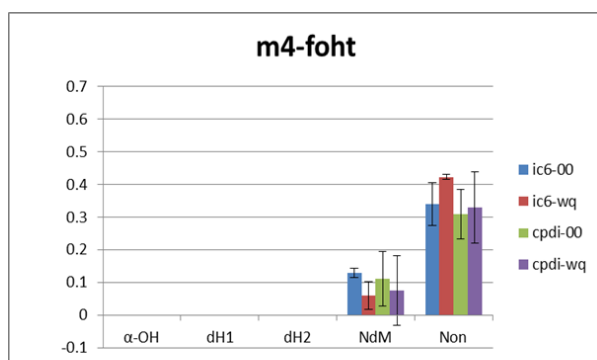

No significant differences between any of the results

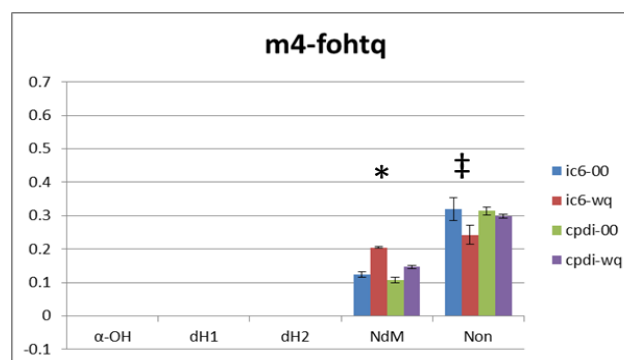

(\*) NdM: ic6-wq from all the rest, ic6-00 from cpdi-wq, and cpdi-00 from cpdi-wq.

(‡) Non: ic6-00 from ic6-wq

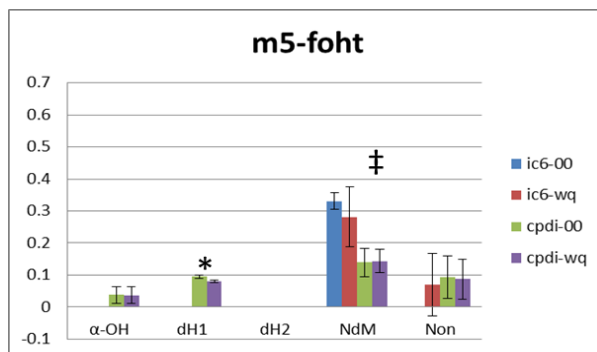

(\*) dH1: both ic6's from both cpdi's

(‡) NdM: both ic6's from both cpdi's

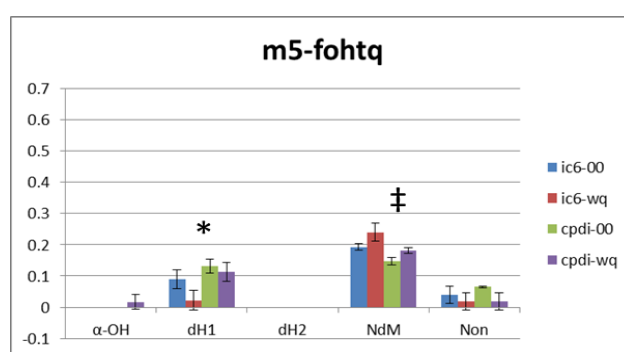

(\*) dH1: ic6-wq from cpdi-00

(‡) NdM: ic6-wq from both cpdi's

(B)

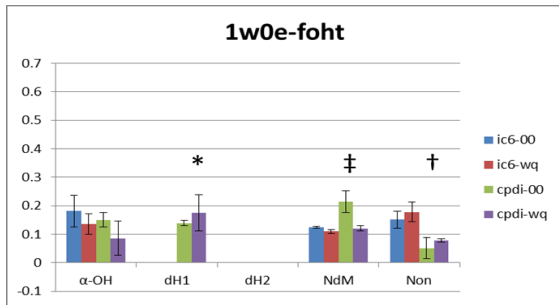

(\*) dH1: both ic6's from both cpdi's  
 (‡) NdM: cpdi-00 from all the rest  
 (†) Non: both ic6's from cpdi-00 and ic6-wq from cpdi-wq

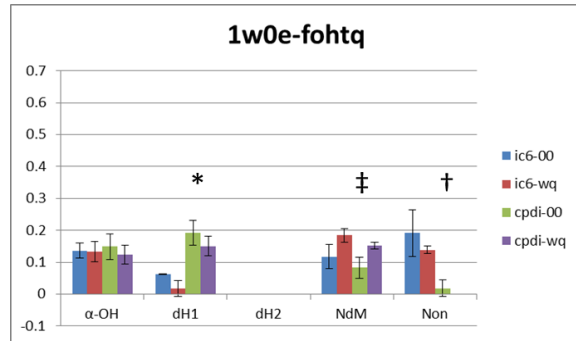

(\*) dH1 both ic6's from both cpdi's  
 (‡) NdM: ic6-wq from cpdi-00  
 (†) Non: ic6-00 from both cpdi's and ic6-wq from cpdi-wq

(C)

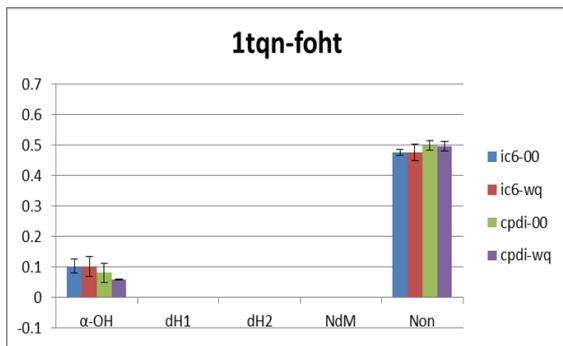

No significant differences between any of the results

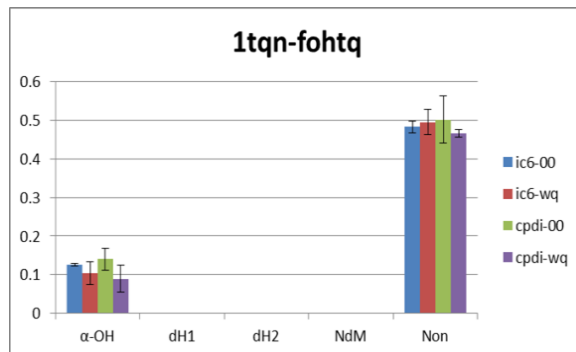

No significant differences between any of the results

**Supplementary information Table 1:** Mulliken atomic spin densities of key atoms for (i) four conformations (A-D) of open-shell intermediate first cationic intermediate of 4-dehydrogenation with average values and standard deviation at each atom for all four conformations are given; (ii) for the A conformation of 4-hydroxytamoxifen three neutral radical intermediate species. For species formed from aliphatic hydrogen atom (H9 a/b) an average value (Avg C9) and standard deviation (St Dev C9) is provided. Values for the radical formed from abstraction of the hydroxyl hydrogen atom are indicated (=O). Energy differences are in units of kcal/mol

(i)

| FOHT Cat1   | A     | B     | C     | D     | Average | St Dev |
|-------------|-------|-------|-------|-------|---------|--------|
| C7          | 0.04  | 0.06  | 0.06  | 0.04  | 0.05    | 0.01   |
| C8          | 0.33  | 0.35  | 0.34  | 0.33  | 0.34    | 0.01   |
| C9          | -0.02 | -0.02 | -0.02 | -0.02 | -0.02   | 0.00   |
| H9a         | 0.02  | 0.00  | 0.01  | 0.00  | 0.01    | 0.01   |
| H9b         | 0.00  | 0.01  | 0.00  | 0.02  | 0.01    | 0.01   |
| C10         | 0.02  | 0.02  | 0.02  | 0.02  | 0.02    | 0.00   |
| O29         | 0.03  | 0.02  | 0.02  | 0.03  | 0.02    | 0.00   |
| C26         | 0.13  | 0.15  | 0.15  | 0.13  | 0.14    | 0.01   |
| H26a        | -0.01 | -0.01 | -0.01 | -0.01 | -0.01   | 0.00   |
| C12         | 0.00  | 0.00  | 0.00  | 0.00  | 0.00    | 0.00   |
| C13         | 0.00  | 0.00  | 0.00  | 0.00  | 0.00    | 0.00   |
| H29a        | 0.00  | 0.00  | 0.00  | 0.00  | 0.00    | 0.00   |
| Energy Diff | 0.00  | 0.25  | 0.51  | 0.05  |         |        |

(ii)

| FOHT Neu    | H9a   | H9b   | Avg C9 | St Dev C9 | =O    |
|-------------|-------|-------|--------|-----------|-------|
| C7          | 0.64  | 0.62  | 0.64   | 0.00      | -0.12 |
| C8          | -0.15 | -0.20 | -0.15  | 0.00      | 0.19  |
| C9          | 0.23  | 0.37  | 0.23   | 0.00      | -0.01 |
| H9a         |       | -0.02 | -0.02  | 0.00      | 0.01  |
| H9b         | -0.01 |       | -0.01  | 0.00      | 0.00  |
| C10         | -0.02 | -0.03 | -0.02  | 0.00      | 0.01  |
| O29         | 0.02  | 0.02  | 0.02   | 0.00      | 0.37  |
| C26         | -0.01 | -0.01 | -0.01  | 0.00      | 0.02  |
| H22a        | 0.00  | 0.00  | 0.00   | 0.00      | 0.00  |
| C25         | 0.00  | 0.00  | 0.00   | 0.00      | 0.00  |
| C26         | 0.00  | 0.00  | 0.00   | 0.00      | 0.00  |
| H30a        | 0.00  | 0.00  |        |           |       |
| Energy Diff | 0.06  | 0.27  |        |           | 0.00  |

**Supporting information Table 2:** Dihedrals (in degrees) of the test set for ethyl scans at their energy minima: alpha, beta and gamma defined in supplementary information figure 3 above.

| A             | $\alpha$ |        |        | $\beta$ |        |        | $\gamma$ |        |        |
|---------------|----------|--------|--------|---------|--------|--------|----------|--------|--------|
|               | HF       | B3LYP  | MP2    | HF      | B3LYP  | MP2    | HF       | B3LYP  | MP2    |
| C7-C8-C11-C12 | 132.7    | 109.9  | 131.3  | -137.3  | -140.1 | -128.7 | 132.7    | 109.9  | -73.3  |
| C8-C7-C10-C19 | 137.0    | 147.4  | -137.4 | 138.4   | 150.3  | -45.9  | 45.8     | -34.9  | -137.4 |
| <b>B</b>      |          |        |        |         |        |        |          |        |        |
| C7-C8-C11-C12 | 100.4    | 100.4  | 95.9   | -109.6  | -109.6 | -94.1  | 100.4    | 100.4  | 95.9   |
| C8-C7-C10-C19 | -90.2    | -83.6  | -92.0  | -89.8   | -111.2 | -88.4  | -90.2    | -86.0  | -91.9  |
| <b>C</b>      |          |        |        |         |        |        |          |        |        |
| C7-C8-C11-C12 | -128.9   | -129.6 | -126.6 | 121.1   | 120.4  | 113.4  | -128.9   | -129.6 | -126.6 |
| C8-C7-C10-C19 | -57.3    | -50.6  | -52.9  | -60.1   | -53.7  | -55.3  | -57.3    | -50.8  | -52.9  |
| C8-C7-C2-C1   | -43.6    | -38.1  | -40.2  | -42.9   | -37.4  | -39.5  | -43.6    | -37.8  | -40.2  |
| <b>D</b>      |          |        |        |         |        |        |          |        |        |
| C7-C8-C11-C12 | -112.1   | -76.2  | -73.2  | 117.9   | 113.8  | 116.8  | -112.1   | -76.2  | -73.2  |
| C8-C7-C10-C19 | -68.2    | -63.6  | -64.1  | -116.5  | -57.1  | -55.9  | -117.5   | -63.6  | -64.0  |
| C8-C7-C2-C1   | -66.1    | -47.2  | -47.0  | -117.1  | -49.6  | -48.9  | -125.6   | -46.9  | -47.0  |
| C7-C8-C9-C20  | -83.4    | -48.9  | -49.1  | -99.3   | -55.3  | -54.6  | -119.4   | -48.3  | -49.1  |
| <b>E</b>      |          |        |        |         |        |        |          |        |        |
| C7-C8-C11-C12 | 113.8    | 115.8  | 116.3  | -106.2  | -74.2  | -73.7  | 113.8    | 115.8  | 116.3  |
| C8-C7-C10-C19 | -66.7    | -58.8  | -57.1  | -71.8   | -63.9  | -64.8  | -112.8   | -58.6  | -57.1  |
| C8-C7-C2-C1   | -54.9    | -47.5  | -47.9  | -61.4   | -45.6  | -46.1  | -119.9   | -47.6  | -48.0  |
| C7-C8-C9-C20  | -63.3    | -56.1  | -54.7  | -81.0   | -49.6  | -49.4  | -100.2   | -55.8  | -54.9  |



**Supplementary information Table 3:** Ingress/egress channels found in x-ray structures PDB ID: 2J0D, 2V0M and 3NXU.

| x-ray | channel | 2a | 2b | 2e | 2f | 4 | 5 | Solvent |
|-------|---------|----|----|----|----|---|---|---------|
| 2J0D  | 3       |    | 2b | 2e |    |   |   | S       |
| 2V0M  | 4       | 2a | 2b |    |    | 4 |   | S       |
| 3NXU  | 3       |    | 2b |    | 2f |   |   | S       |
